# Supplementary material
Source: PubMed Central journal article supplement (PMC10527554)

Full unedited gels for **Supplementary Figure 2**

Zfhx3

Cre

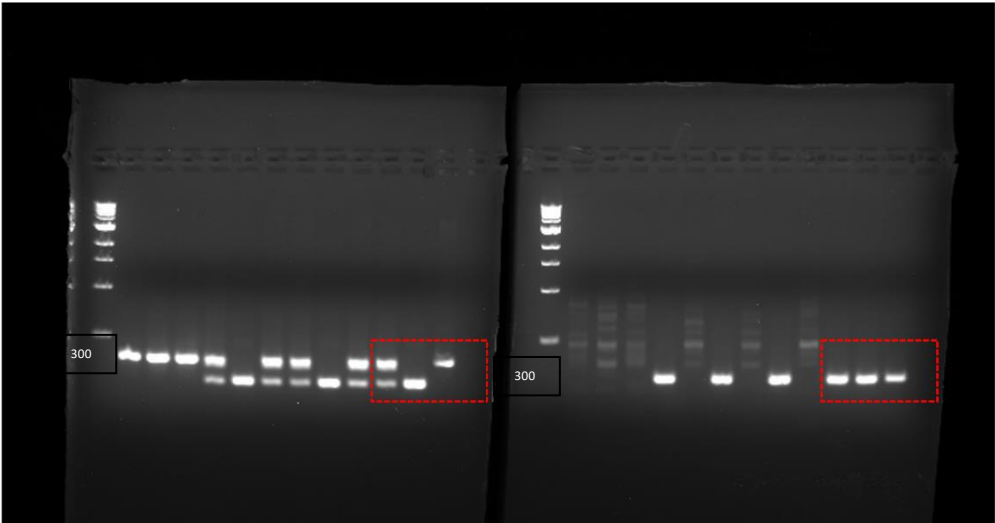

Supplement: NIHMS1913250-supplement-Uncropped_gels.pdf [file NIHMS1913250-supplement-Uncropped_gels.pdf]
